# Supplementary material for: Evaluation of Computationally Designed Peptides against TWEAK, a Cytokine of the Tumour Necrosis Factor Ligand Family
Source: MDPI journal article supplement (doi:10.3390/ijms22031066), 2021-01-21
Supplement: s1 [file s1]

Supplementary material to

**Computational design of peptides to target TWEAK, a cytokine of the tumour  
necrosis factor ligand family.**

*Badia-Villanueva et al.*

## Supplementary Figures

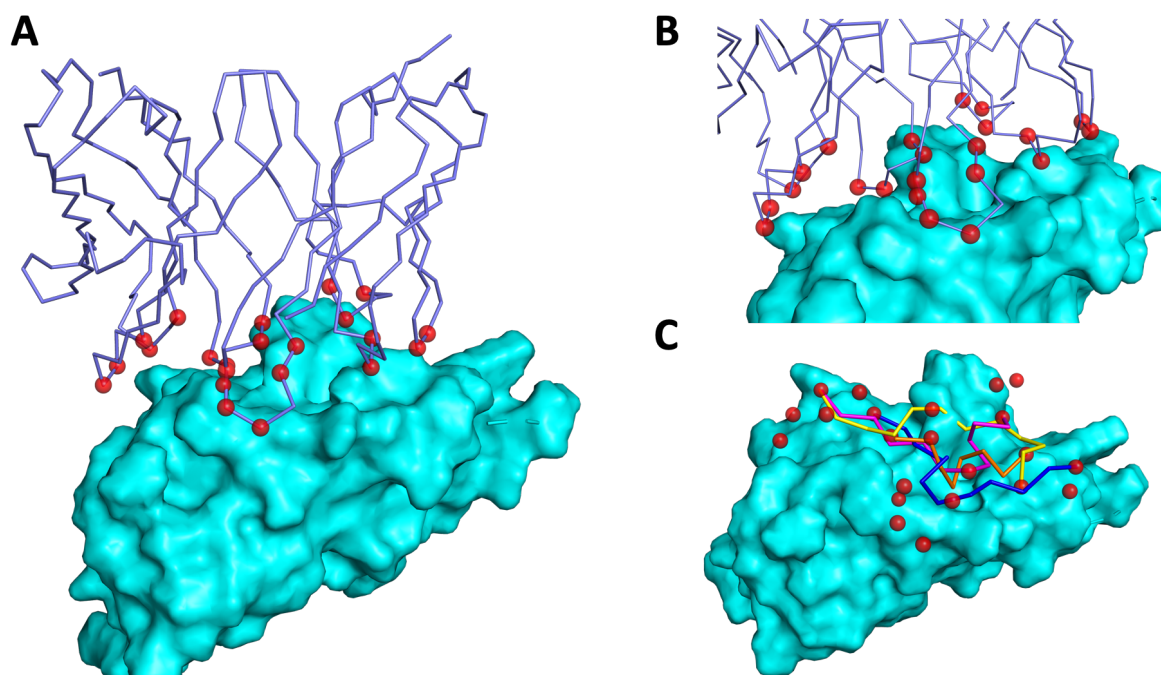

**Figure S1 Depiction of the modeling process. A)** Structure of the human TWEAK in complex with the Fab fragment of a neutralizing antibody (PDB code: 4HT1[1]); TWEAK and Antibody shown in surface (cyan) and ribbon (light blue) respectively. The C-alpha of the interface residues belonging to the Antibody used to model peptides (*anchor residues*) are shown as red spheres. **B)** Close-up of the interface TWEAK-Antibody. **C)** Structural model of TWEAK and few designed peptides; peptides shown as C-alpha traces.

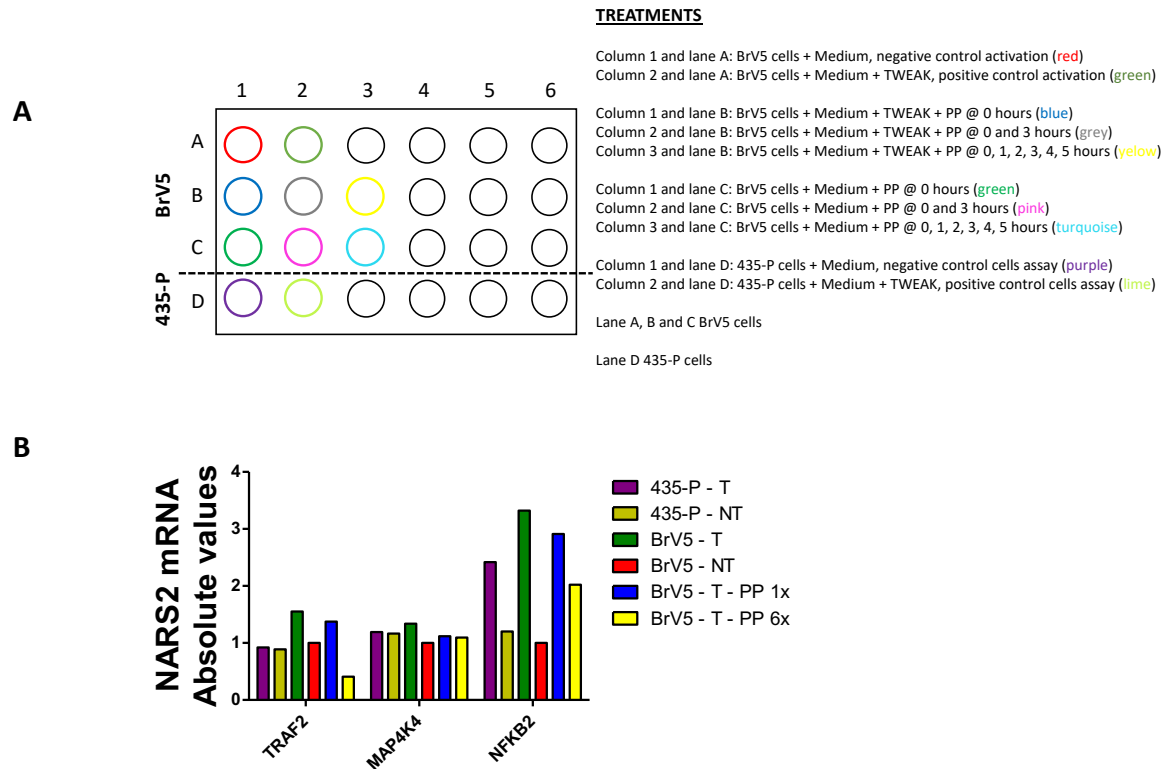

**Figure S2. Design of cell array and treatments. A)** Schematic representation of the different culture conditions that we performed to analyze gene expression of cells stimulated with TWEAK and the inhibitory ability of peptides to override TWEAK- Fn14 signaling pathway. BrV5 cells were plated in 24 well plates, 125.000 in 500  $\mu$ l DMEN-F12 with 10% FBS 24 h. After overnight starvation, cultures were treated with or without peptides (450  $\mu$ M), in the presence or absence of TWEAK (25 ng/mL final concentration), including positive and negative controls to check peptides activity and the inhibitory potential of each peptide concentration according the illustrated scheme.

**B)** In addition to the array technique, RNA extracted at 6 h was evaluated with RT-PCR as an alternative technique. The expression of MAP4K4 (NIK), TRAF2 and NFkB2 (NIK) normalized to NARS2 (error bars show s.e.m. of 3 technical replicates) we evaluated in BrV5 cells with (BrV5-T) or without (BrV5-NT) TWEAK. BrV5-T fed each hour, 6 times total (PP x1) and only one time at 0 h (PP x1), are compared. Comparison of gene expression in TWEAK independent cells 435-P with (BrV5-T) or without (BrV5-NT) TWEAK are included in the analyses.

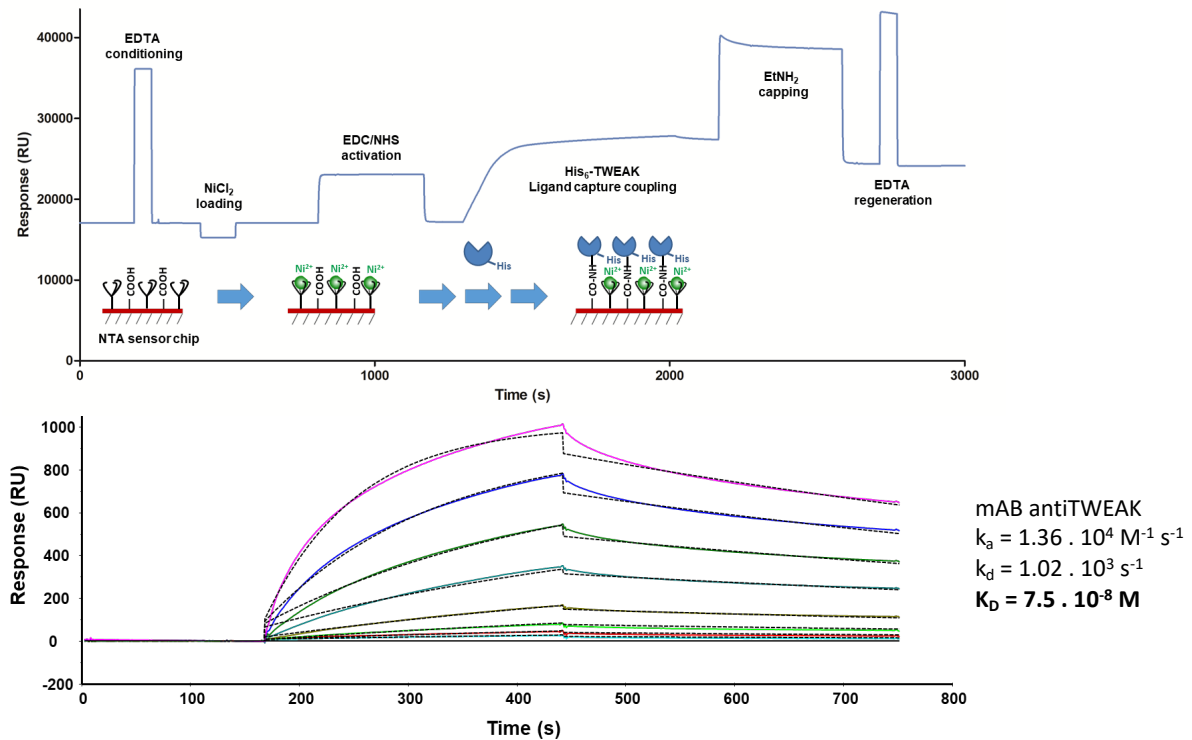

**Figure S3. Immobilization of TWEAK and validation. A)** Sensorgram generated during the immobilization of a single flow cell using an NTA chip and the capture coupling method. **B)** SPR binding sensorgrams of mAb ANTI-TWEAK to immobilized human His<sub>6</sub>-TWEAK. Experimental data (coloured lines) were globally fit to a 1:1 binding model (dotted black lines) using BIAevaluation to determine the indicated kinetic rate and affinity constants.

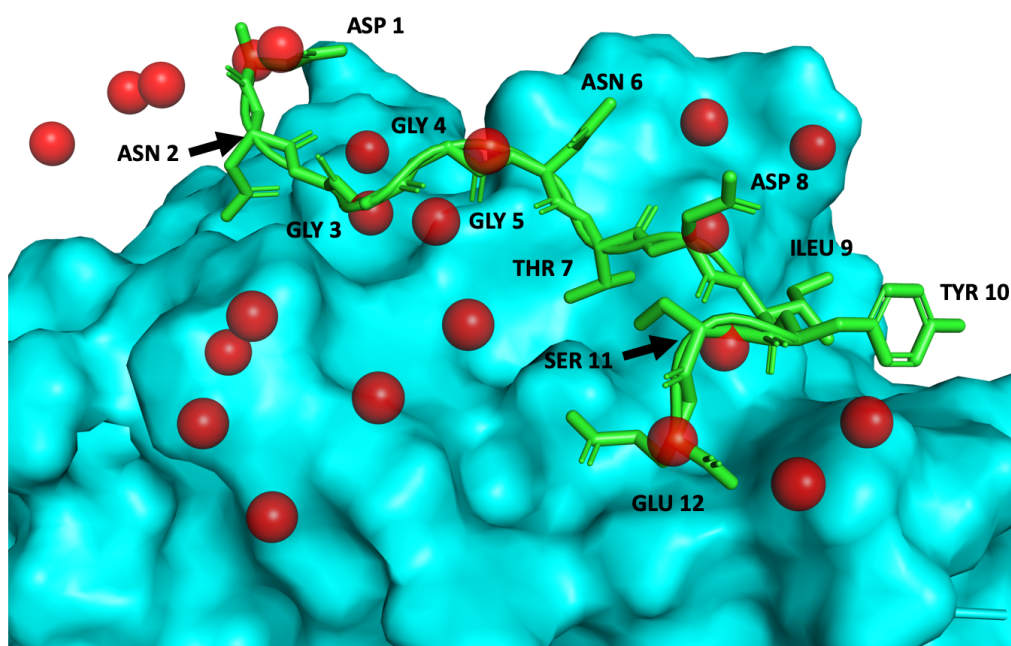

**Figure S4. Structural modeling of PEP30-TWEAK complex.** TWEAK and PEP30 shown in cyan (surface representation) and green (cartoon and stick representation) respectively. Several residues of PEP30 are shown for reference. Red spheres represent the anchor residues derived from the TWEAK-Antibody structure (PDB code: 4HT1[1]) used for peptide modeling (see Material and Methods and Supplementary file File2.coord.pdb).

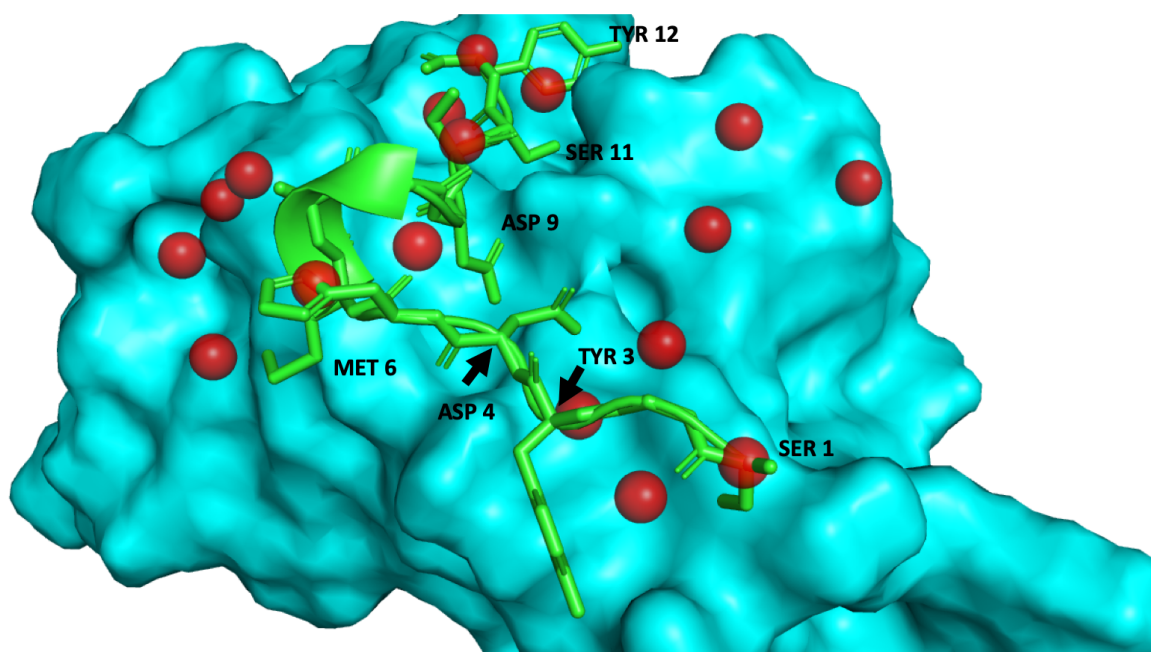

**Figure S5. Structural model of PEP35-TWEAK complex.** TWEAK and PEP35 shown in cyan (surface representation) and green (cartoon and stick representation) respectively. Several residues of PEP35 are shown for reference. Red spheres represent the anchor residues derived from the TWEAK-Antibody structure (PDB code: 4HT1[1]) used for peptide modeling (see Material and Methods and Supplementary file File3.coord.pdb).

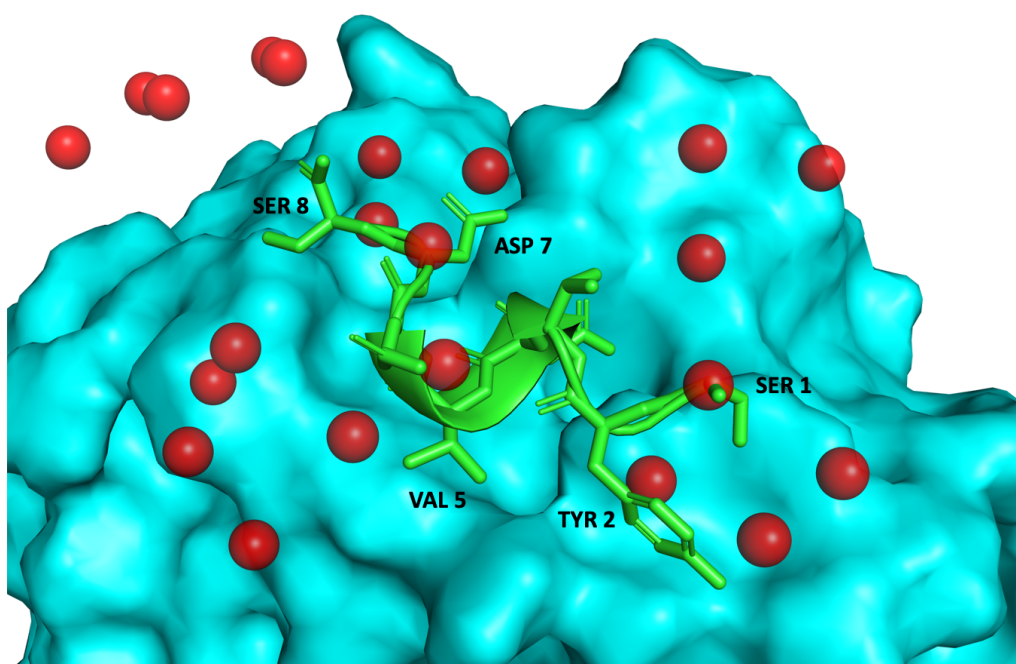

**Figure S6. Structural model of PEP49-TWEAK complex.** TWEAK and PEP49 shown in cyan (surface representation) and green (cartoon and stick representation) respectively. Several residues of PEP49 are shown for reference. Red spheres represent the anchor residues derived from the TWEAK-Antibody structure (PDB code: 4HT1[1]) used for peptide modeling (see Material and Methods and Supplementary file File4.coord.pdb).

# Supplementary Tables.

**Table S1.** Analytical summary of designed and synthesized TWEAK-Fn14 inhibitory peptides.

| ID | Pool <sup>a</sup> | Modeling ID | Peptide Sequence | Size | Charge<br>(pH 1) | Charge<br>(pH 7) | Analytical Characterization |                                |                      |                         |
|----|-------------------|-------------|------------------|------|------------------|------------------|-----------------------------|--------------------------------|----------------------|-------------------------|
|    |                   |             |                  |      |                  |                  | MW (Da) <sup>b</sup>        | RP-HPLC<br>method <sup>c</sup> | t <sub>R</sub> (min) | Purity (%) <sup>d</sup> |
| 1  | 5                 | TWFA_10280  | GNGTDDNSGTSY     | 12   | 1                | -1               | 1186.11                     | 0-25% B                        | 5.68                 | 92                      |
| 2  | 3                 | TWFA_3299   | YNVSVAGGHT       | 10   | 2                | 1,1              | 1003.08                     | 5-40% B                        | 5.08                 | 99                      |
| 3  | 1                 | TWNFA_1636  | TKGGGTADA        | 9    | 2                | 1                | 775.82                      | 0-10% B                        | 3.45                 | 97                      |
| 4  | 1                 | TWNFA_1387  | SGVSTAQLD        | 9    | 1                | 0                | 875.93                      | 5-40% B                        | 5.28                 | 96                      |
| 5  | 3                 | TWNFA_4288  | LGAADQGLDI       | 10   | 1                | -1               | 971.08                      | 5-50% B                        | 6.70                 | 98                      |
| 6  | 6                 | TWNFA_8523  | GHALESSDLAQSAG   | 14   | 2                | -0,9             | 1270.32                     | 5-40% B                        | 5.49                 | 94                      |
| 7  | 5                 | TWNFA_3718  | HGTQSVSNFIGAH    | 13   | 3                | 1,2              | 1353.46                     | 5-40% B                        | 6.90                 | 97                      |
| 8  | 3                 | TWFA_31792  | SSYGGYAEDA       | 10   | 1                | 1                | 1018.01                     | 5-60% B                        | 4.33                 | 89                      |
| 9  | 5                 | TWFA_15148  | DLNYHGATAANY     | 12   | 2                | 0,1              | 1308.37                     | 5-40% B                        | 6.19                 | 98                      |
| 10 | 3                 | TWNFA_2203  | SFHTLAGALG       | 10   | 2                | 1,1              | 972.11                      | 5-60% B                        | 6.43                 | 92                      |
| 11 | 1                 | TWNFA_5901  | SGVAYQETT        | 9    | 1                | 0                | 954.01                      | 5-60% B                        | 5.87                 | 92                      |
| 12 | 4                 | TWFA_10298  | GNLDDAIDHSY      | 11   | 2                | -1,9             | 1218.25                     | 5-60% B                        | 5.40                 | 93                      |
| 13 | 1                 | TWFA_20354  | YSGYFGGFY        | 9    | 1                | 1                | 1059.15                     | 5-60% B                        | 7.76                 | 94                      |
| 14 | 5                 | TWNFA_8477  | AANSETASTSGTG    | 13   | 1                | 0                | 1152.14                     | 0-20% B                        | 5.30                 | 89                      |
| 15 | 3                 | TWFA_31907  | SSFSYALSNT       | 10   | 1                | 1                | 1075.14                     | 5-60% B                        | 8.23                 | 92                      |
| 16 | 2                 | TWFA_16795  | DDTSGALSS        | 9    | 1                | -1               | 850.84                      | 5-60% B                        | 3.06                 | 90                      |
| 17 | 4                 | TWFA_3036   | YNNVNLSDTGS      | 11   | 1                | 0                | 1182.21                     | 5-60% B                        | 4.38                 | 92                      |
| 18 | 3                 | TWFA_31985  | SSMAYGFTNA       | 10   | 1                | 1                | 1047.16                     | 10-50% B                       | 5.30                 | 99                      |
| 19 | 2                 | TWNFA_1636  | EDSLDTIAT        | 9    | 1                | -2               | 963.01                      | 5-60% B                        | 5.45                 | 91                      |
| 20 | 3                 | TWNFA_1869  | DLTADEDGLG       | 10   | 1                | -3               | 1004.02                     | 5-60% B                        | 7.56                 | 96                      |
| 21 | 3                 | TWNFA_5451  | GSGGDFHSLG       | 10   | 2                | 0,1              | 931.96                      | 5-60% B                        | 4.50                 | 95                      |
| 22 | 2                 | TWNFA_1636  | DNGRENSWI        | 9    | 2                | 0                | 1089.13                     | 5-50% B                        | 5.98                 | 99                      |
| 23 | 3                 | TWNFA_1619  | DIIMGVETAY       | 10   | 1                | -1               | 1110.30                     | 15-50% B                       | 5.70                 | 98                      |
| 24 | 4                 | TWNFA_3137  | DMDAELDSGA       | 10   | 1                | -3               | 1022.06                     | 5-60% B                        | 4.79                 | 95                      |
| 25 | 2                 | TWNFA_1996  | ISGGWDDTA        | 9    | 1                | -1               | 919.95                      | 5-40% B                        | 6.28                 | 97                      |
| 26 | 4                 | TWNFA_1615  | ESAVDGGVTA       | 10   | 1                | -1               | 903.94                      | 5-50% B                        | 4.12                 | 97                      |
| 27 | 4                 | TWNFA_3119  | VVVEDVNFDD       | 10   | 1                | -3               | 1149.22                     | 5-60% B                        | 6.22                 | 90                      |
| 28 | 2                 | TWNFA_3092  | GKDSGSHLG        | 9    | 3                | 1,1              | 855.91                      | 5-60% B                        | 2.00                 | 94                      |
| 29 | 4                 | TWNFA_3123  | GDGTVSDTSS       | 10   | 1                | -1               | 923.89                      | 5-60% B                        | 1.63                 | 96                      |
| 30 | 5                 | TWNFA_3655  | DNGGGNTDIYSE     | 12   | 1                | -2               | 1240.21                     | 5-60% B                        | 6.50                 | 88                      |
| 31 | 6                 | TWFA_21597  | YDGGGAATGDNFYDT  | 14   | 1                | -2               | 1465.45                     | 5-60% B                        | 5.38                 | 95                      |
| 32 | 6                 | TWFA_30464  | GSRDGGGLITTSVSNY | 15   | 2                | 1                | 1525.64                     | 5-60% B                        | 5.67                 | 99                      |
| 33 | 2                 | TWFA_33056  | RYKGHIYNY        | 9    | 4                | 3,1              | 1212.38                     | 5-60% B                        | 6.82                 | 94                      |
| 34 | 2                 | TWFA_32757  | RYYTAIGQY        | 9    | 2                | 2                | 1133.27                     | 5-60% B                        | 5.47                 | 98                      |
| 35 | 5                 | TWFA_31251  | SWYDHMAGDSSY     | 12   | 2                | -0,9             | 1417.48                     | 5-60% B                        | 5.93                 | 95                      |
| 36 | 4                 | TWFA_32845  | RGHSGTDIGNY      | 11   | 3                | 1,1              | 1175.23                     | 5-60% B                        | 3.19                 | 90                      |
| 37 | 6                 | TWFA_5965   | YNSGTGYAAQSDAR   | 14   | 2                | 1                | 1459.50                     | 5-60% B                        | 3.58                 | 88                      |
| 38 | 6                 | TWFA_33014  | RLSIYYGASVGDSY   | 14   | 2                | 1                | 1559.70                     | 5-60% B                        | 6.46                 | 84                      |
| 39 | 6                 | TWFA_30152  | LSGGFLGDGAAGQNDD | 17   | 1                | -2               | 1655.70                     | 5-60% B                        | 6.29                 | 97                      |
| 40 | 6                 | TWNFA_3713  | LGHGFAGYAFEEERG  | 15   | 3                | 0,1              | 1580.72                     | 5-60% B                        | 6.30                 | 97                      |
| 41 | 5                 | TWNFA_3125  | DSGGDFDVHHVA     | 12   | 3                | -1,8             | 1254.28                     | 5-60% B                        | 4.36                 | 90                      |
| 42 | 1                 | TWFA_594    | YNGHVKDD         | 8    | 2                | 0,1              | 945.99                      | 20-40% B                       | 2.10                 | 90                      |
| 43 | 5                 | TWNFA_3770  | TTDGSTGDDLQA     | 12   | 1                | -2               | 1179.16                     | 5-60% B                        | 3.43                 | 96                      |
| 44 | 4                 | TWFA_33135  | RNSAYNDGHY       | 10   | 3                | 1,1              | 1195.22                     | 5-60% B                        | 3.27                 | 92                      |
| 45 | 1                 | TWFA_15353  | DGGNY            | 5    | 1                | 0                | 523.50                      | 5-60% B                        | 1.50                 | 90                      |
| 46 | 1                 | TWNFA_2847  | TGYAENV          | 7    | 1                | 0                | 751.79                      | 5-60% B                        | 3.65                 | 91                      |
| 47 | 4                 | TWNFA_1221  | GSALDESTVV       | 10   | 1                | -1               | 976.05                      | 5-60% B                        | 5.09                 | 95                      |
| 48 | 2                 | TWFA_7648   | YNNDDAANP        | 9    | 1                | -1               | 991.97                      | 5-60% B                        | 2.51                 | 95                      |
| 49 | 1                 | TWFA_23396  | SYTDVQDS         | 8    | 1                | -1               | 912.91                      | 5-60% B                        | 3.47                 | 93                      |
| 50 | 2                 | TWNFA_2782  | GSAADTTRS        | 9    | 2                | 1                | 863.88                      | 0-40% B                        | 3.33                 | 98                      |

<sup>a</sup> Peptides were pooled according to size *i.e.*, pool 1 included peptides with 5 to 9 amino acid residues; pool 2 peptides with 9 residues; pool 3 with 10 residues length; pool 4 between 10 to 11; pool 5 between 12 to 13; and pool 6 peptide sizes between 14 to 17 amino acids. <sup>b</sup> Identity was established by HPLC-MS. <sup>c</sup> Analytical RP-HPLC was performed using linear gradients of solvent B (0.036% TFA in ACN) into A (0.045% TFA in H<sub>2</sub>O) over 15 min at 1 mL/min flow rate and with UV detection at 220 nm. <sup>d</sup> Peptide purity was calculated using the percentage of peak area at the chromatographic profile.



**Table S2.** Normalized level of expression of Fn14 gene with and without TWEAK (25 ng/ml) in HT29, 435-P, 435-Br1 and BRV5 cell lines.

| Cell Line | Technical Replicate | TWEAK treatment | Expression |
|-----------|---------------------|-----------------|------------|
| HT29      | 1                   | NO              | 0.1839     |
| HT29      | 2                   | NO              | 0.1754     |
| HT29      | 3                   | NO              | 0.1792     |
| HT29      | 1                   | YES             | 0.1964     |
| HT29      | 2                   | YES             | 0.2154     |
| HT29      | 3                   | YES             | 0.2052     |
| 435-P     | 1                   | NO              | 0.1885     |
| 435-P     | 2                   | NO              | 0.1743     |
| 435-P     | 3                   | NO              | 0.1553     |
| 435-P     | 1                   | YES             | 0.1395     |
| 435-P     | 2                   | YES             | 0.1292     |
| 435-P     | 3                   | YES             | 0.1408     |
| 435-Br1   | 1                   | NO              | 0.1705     |
| 435-Br1   | 2                   | NO              | 0.1786     |
| 435-Br1   | 3                   | NO              | 0.1755     |
| 435-Br1   | 1                   | YES             | 0.1600     |
| 435-Br1   | 2                   | YES             | 0.1676     |
| 435-Br1   | 3                   | YES             | 0.1719     |
| BRV5      | 1                   | NO              | 0.0909     |
| BRV5      | 2                   | NO              | 0.0826     |
| BRV5      | 3                   | NO              | 0.0806     |
| BRV5      | 1                   | YES             | 0.1340     |
| BRV5      | 2                   | YES             | 0.1202     |
| BRV5      | 3                   | YES             | 0.1441     |

**Table S3.** Normalized level of expression of genes in pool experiments using the housekeeping gene NARS2 as reference.

| Gene             | NT      | T       | Pool 1  | Pool 2 | Pool 3  | Pool 4 | Pool 5  | Pool 6  |
|------------------|---------|---------|---------|--------|---------|--------|---------|---------|
| <b>TRAF2</b>     | 0.9921  | 1.2452  | -1.4615 | 0.0357 | -0.0020 | 0.9037 | -0.7081 | -1.0050 |
| <b>TNFRSF12A</b> | -0.5742 | -0.4905 | -1.2744 | 0.2624 | 0.5763  | 1.9755 | -0.6786 | 0.2036  |
| <b>MAP4K4</b>    | -0.7183 | -0.5276 | -1.5660 | 0.3580 | -0.1045 | 1.6294 | -0.0491 | 0.9782  |
| <b>NFKB2</b>     | -0.8208 | -0.0374 | -1.3178 | 0.3794 | -0.3141 | 2.0742 | -0.1278 | 0.1645  |
| <b>MAPK14</b>    | 0.1383  | 0.2377  | -2.1390 | 0.4708 | -0.1352 | 1.4430 | -0.1234 | 0.1078  |
| <b>JUN</b>       | -1.0148 | -1.0121 | -0.9558 | 0.6237 | -0.1854 | 1.4094 | -0.1318 | 1.2670  |
| <b>IL6</b>       | -1.2090 | -1.2337 | -0.6000 | 0.5934 | 0.8668  | 1.2794 | 0.8111  | -0.5080 |
| <b>HSP90B1</b>   | -0.5944 | -0.5008 | -1.7316 | 0.9650 | -0.0707 | 1.4050 | -0.1534 | 0.6809  |
| <b>BIRC2</b>     | -0.6423 | 1.2334  | -1.6606 | 0.8368 | -0.3445 | 1.0954 | -0.5376 | 0.0195  |

**Table S4.** Normalized level of expression of genes in individual peptide experiments using the housekeeping gene NARS2 as reference.

| Gene             | NT      | T       | P45     | P46     | P42     | P49     | P3      | P4      | P11     | P13     | P1      | P9      | P30     | P35     | P41     | P43     | P7      | P14     |
|------------------|---------|---------|---------|---------|---------|---------|---------|---------|---------|---------|---------|---------|---------|---------|---------|---------|---------|---------|
| <b>TRAF2</b>     | 3.0439  | 2.2919  | -0.5070 | -0.1604 | -0.1276 | -0.5766 | -0.4866 | -0.2666 | -0.4411 | 0.2550  | -0.4104 | -0.2477 | -0.4386 | -0.5479 | -0.2014 | -0.4089 | -0.2173 | -0.5527 |
| <b>TNFRSF12A</b> | 2.3399  | 1.8000  | -0.0236 | -0.2543 | 0.3098  | -1.0819 | 1.1044  | -0.6289 | -0.2085 | 0.9100  | -0.0875 | 0.0743  | -1.1120 | -1.0476 | -0.6825 | -1.1086 | -0.5864 | 0.2834  |
| <b>MAP4K4</b>    | 0.6666  | 0.6195  | -0.0124 | 0.6365  | 1.1128  | -1.3594 | 1.3444  | 0.6937  | 0.3403  | 1.6990  | -0.3569 | -0.1373 | -1.5551 | -1.7018 | 0.1763  | -1.1253 | -0.7317 | -0.3092 |
| <b>NFKB2</b>     | -0.0595 | 1.4080  | 0.0982  | 1.3042  | 1.3869  | -1.1526 | 1.2258  | 0.3908  | 0.6220  | 1.1240  | -0.1191 | -0.4681 | -1.3232 | -1.5063 | -0.6577 | -1.2088 | -0.6607 | -0.4038 |
| <b>MAPK14</b>    | 2.1766  | 2.3319  | 0.1219  | 0.5199  | 0.3913  | -0.5853 | 0.3511  | -0.0192 | 0.3151  | 0.6701  | -0.6461 | -0.6137 | -1.1124 | -1.1107 | -0.4551 | -1.0059 | -0.6198 | -0.7097 |
| <b>JUN</b>       | -0.7833 | -0.7938 | -0.0963 | -0.1078 | -0.1905 | -0.2062 | 0.5369  | 0.0589  | 0.0366  | 3.7769  | -0.3055 | -0.1385 | -0.5095 | -0.5085 | -0.3008 | -0.4883 | 0.2734  | -0.2537 |
| <b>IL6</b>       | -1.4728 | -1.5585 | -0.2605 | -0.0166 | 0.2346  | -0.9717 | 1.1687  | 0.0669  | -0.2862 | 2.8881  | 0.4124  | -0.1350 | -0.0450 | 0.1984  | -0.7093 | -0.5351 | 0.5279  | 0.4937  |
| <b>HSP90B1</b>   | 0.7895  | 0.8798  | 0.0825  | 0.1322  | 0.9131  | -0.4678 | 2.9702  | 0.3256  | 0.5337  | -0.1010 | -0.5389 | -0.4890 | -0.9208 | -1.1014 | -0.4648 | -1.3086 | -0.5127 | -0.7215 |
| <b>BIRC2</b>     | 0.9023  | 2.9803  | -0.0012 | -0.1180 | -0.1362 | -0.1150 | 1.1157  | 0.4721  | 0.5906  | -0.8852 | 0.2639  | -0.0012 | -0.6095 | -0.7468 | -0.8982 | -0.9963 | -1.2320 | -0.5850 |

## Supplementary Files.

**File1.coord.pdb.** Atom coordinates in PDB (<http://www.rcsb.org>) format for TWEAK - peptide P43 complex.

**File2.coord.pdb.** Atom coordinates in PDB (<http://www.rcsb.org>) format for TWEAK - peptide P30 complex.

**File3.coord.pdb.** Atom coordinates in PDB (<http://www.rcsb.org>) format for TWEAK - peptide P35 complex.

**File4.coord.pdb.** Atom coordinates in PDB (<http://www.rcsb.org>) format for TWEAK - peptide P49 complex.

**File5.xlsx.** Normalized level of expression of probe genes.

## References

[1] Lammens A, Baehner M, Kohnert U, Niewoehner J, von Proff L, Schraeml M, et al. Crystal structure of human TWEAK in complex with the Fab fragment of a neutralizing antibody reveals insights into receptor binding. PLoS One. 2013;8:e62697.
